# Supplementary material
Source: publisher site journal article supplement (https://www.dovepress.com/article/263155)
Supplement: Supplementary file 1 [file get_supplementary_file.php]

Table S1. Score of behavioural problems.

| Topics | Degree | Score |
| --- | --- | --- |
| Impulsive movements (biting nails, sucking fingers) | Never | 1 |
| Rarely | 2 |
| Occasionally | 3 |
| Often | 4 |
| Always | 5 |
| Not in sync with the group  (seldom interaction with teachers and other children) | Never | 1 |
| Rarely | 2 |
| Occasionally | 3 |
| Often | 4 |
| Always | 5 |
| Overdependence  (seeking help even if capable of accomplishing the task by himself) | Never | 1 |
| Rarely | 2 |
| Occasionally | 3 |
| Often | 4 |
| Always | 5 |
| Poor adaptability (to new environments or strangers) | Never | 1 |
| Rarely | 2 |
| Occasionally | 3 |
| Often | 4 |
| Always | 5 |
| Conduct problems (lying, stealing) | Never | 1 |
| Rarely | 2 |
| Occasionally | 3 |
| Often | 4 |
| Always | 5 |
| Inattention | Never | 1 |
| Rarely | 2 |
| Occasionally | 3 |
| Often | 4 |
| Always | 5 |
